# Supplementary material for: Reversible two-channel mechanochromic luminescence for a pyridinium-based white-light emitter with room-temperature fluorescence–phosphorescence dual emission
Source: Royal Society of Chemistry journal article supplement (doi:10.1039/c9cp02451d), 2019-01-01
Supplement: c9cp02451d1.pdf [file c9cp02451d1.pdf]

## **Electronic Supplementary Information**

### **Reversible Two-channel Mechanochromic Luminescence for Pyridinium-based White-light Emitter with Room Temperature Fluorescence-Phosphorescence Dual Emission**

Xiao Ma\*, Jipeng Li, Chensheng Lin, Guoliang Chai, Yangbin Xie, Wei Huang, Dayu Wu\* and Wai-Yeung Wong\*

## Materials and Methods

**General Information.** All of the chemicals were obtained from commercial sources and used without further purification. IR spectra were recorded in the range of 400–4000  $\text{cm}^{-1}$  on a Nicolet (Impact 410) spectrometer with KBr pellets. The UV-Vis absorption spectra were measured with a Perkin Elmer Lambda 900 Spectrometer. Powder X-ray diffraction (PXRD) measurements were performed on a Bruker D8 Avance X-ray powder diffractometer with Cu K $\alpha$  (1.5418 Å). NMR measurements were carried out on a Bruker DMX500 spectrometer using tetramethylsilane (TMS) as an internal standard. The elemental analysis was determined using a Vario EL III CHNOS elemental analyzer. Fluorescence spectra for the solid samples were recorded at room temperature on an Edinburgh Model FS5 instrument, and emission quantum yield were recorded on integrating sphere SC-30. Luminescence lifetimes ( $\tau$ ) were examined using an Edinburgh Model FLS920 phosphorimeter. The pressure-dependent emission spectra for **P1-PF<sub>6</sub>** were measured by using infrared tablet press method.

**X-ray Crystallography.** Crystallographic data were collected on a Bruker Apex DUO CCD diffractometer with graphite-monochromated Mo K $\alpha$  radiation ( $\lambda = 0.71073$  Å) using the  $\omega$ -scan technique. The intensity data were integrated by using the SAINT program.<sup>[1]</sup> An empirical absorption correction was applied using the SADABS program.<sup>[2]</sup> The structures were solved by direct method and the non-hydrogen atoms were located from the trial structures and then refined anisotropically with SHELXTL using full-matrix least-squares procedures based on  $F^2$  values.<sup>[3]</sup> The positions of the non-hydrogen atoms were refined with anisotropic displacement factors.

### Theoretical calculations

All calculations were performed using the Gaussian 09 series of programs.<sup>[4]</sup> The commonly used Becke's three parameter exchange functional combined with the LYP4 correlation functional (B3LYP) was used for the calculations. The geometry of **P1-PF<sub>6</sub>** for calculations was taken from the X-ray diffraction data. The optimized excited-state geometries of **P1-PF<sub>6</sub>** were calculated by time-dependent density functional theory (TD-DFT) at the B3LYP/6-31G(d) level.

### Synthesis

**2,6-Bis(4-bromophenyl)-4,4'-bipyridine (L):** In a 250 mL round bottom flask, 1-(4-bromophenyl)ethanone (4.30 g, 21.6 mmol), NH<sub>3</sub> (aqueous) (15 mL) and KOH (2.3g, 41.0 mmol) were respectively added to a solution of 4-pyridinecarboxaldehyde (1.14 g, 10.6 mmol) in EtOH (100 mL). The solution was refluxed for 24 h. After cooling down to the room temperature, the solution was evaporated to dryness under reduced pressure to give the crude product. The crude product was washed by cool methanol twice and then recrystallized by ethanol. A pure white solid was obtained. <sup>1</sup>H NMR: (400 MHz, DCM)  $\delta$  8.88 (2 H, s), 8.10 (4 H, d,  $J$  8.0), 7.91 (2 H, s), 7.69 (6 H, d,  $J$  12).

**P1-Br:** (Bromomethyl)benzene (0.073 g, 0.64 mmol) was added into a solution of **L** (0.3 g, 0.64 mmol) in CH<sub>3</sub>CN (16 mL) and the reaction mixture was stirred at 90 °C under N<sub>2</sub> for 12 h. The resultant white precipitate was collected by filtration and washed with CH<sub>3</sub>CN and DCM, giving the yellow product of **P1-Br** with the yield above 90%. <sup>1</sup>H NMR: (400 MHz, DMSO)  $\delta$  9.46 (2 H, d,  $J$  8.0), 8.91 (2 H, d,  $J$  8.0), 8.55 (2 H, s), 8.32 (2 H, d,  $J$  8.0), 7.78 (4 H, d,  $J$  8.0), 7.61 (2 H, d,  $J$  4.0), 7.5–7.41 (3 H, m), 5.92 (2 H, s). IR (KBr,  $\text{cm}^{-1}$ ): 3127(s), 1635(w), 1542(w), 1401(s), 1155(w), 1070(m), 1005(m), 820(s), 743(m), 698(m), 617(m).

**P1-PF<sub>6</sub>:** Excess NH<sub>4</sub>PF<sub>6</sub> (100 mg) was added into a solution of **P1-Br** (150 mg) in CH<sub>3</sub>OH (12 mL). The reaction mixture was stirred at room temperature for 12 h. The deposited light yellow microcrystals with the yield of ~90% were collected by filtration and washed with CH<sub>3</sub>OH. The single crystal could be obtained from slow evaporation of acetonitrile and ethanol solution. Calcd. for C, 49.60; H, 3.01; N, 3.99; Found: C, 49.83; H, 2.99; N, 4.11; <sup>1</sup>H NMR: (400 MHz, DMSO)  $\delta$  9.45 (2 H, d,  $J$  8.0), 8.90 (2 H, d,  $J$  4.0), 8.55 (2 H, s), 8.32 (2 H, d,  $J$  8.0), 7.78 (4 H, d,  $J$  8.0), 7.59 (2 H, d,  $J$  8.0), 7.50–7.42 (3 H, m), 5.90 (2 H, s). MS:  $m/z$  Calcd. for C<sub>29</sub>H<sub>21</sub>BrF<sub>6</sub>N<sub>2</sub>P: 557.00. IR (KBr,  $\text{cm}^{-1}$ ): 3127(s), 1671(m), 1643(m), 1582(w), 1542(w), 1397(s), 1155(w), 1074(m), 1005(m), 832(s), 739(m), 698(m), 617(m), 557(m).

Table S1. Crystallographic data and a summary of the structural refinement results for P1-PF6

|                                                                                        | P1-PF <sub>6</sub>                                                             |
|----------------------------------------------------------------------------------------|--------------------------------------------------------------------------------|
| formula                                                                                | C <sub>29</sub> H <sub>21</sub> N <sub>2</sub> PF <sub>6</sub> Br <sub>2</sub> |
| fw (g/mol)                                                                             | 702.27                                                                         |
| color                                                                                  | light yellow                                                                   |
| T (K)                                                                                  | 175                                                                            |
| Crystal system                                                                         | monoclinic                                                                     |
| Space group                                                                            | <i>P</i> 21/ <i>c</i>                                                          |
| Z                                                                                      | 4                                                                              |
| <i>a</i> [Å]                                                                           | 29.7525(17)                                                                    |
| <i>b</i> [Å]                                                                           | 5.9838(3)                                                                      |
| <i>c</i> [Å]                                                                           | 15.5910(7)                                                                     |
| $\alpha$ [°]                                                                           | 90.00                                                                          |
| $\beta$ [°]                                                                            | 98.639(2)                                                                      |
| $\gamma$ [°]                                                                           | 90.00                                                                          |
| <i>V</i> [Å <sup>3</sup> ]                                                             | 2744.2(2)                                                                      |
| Density (calcd.) [g·cm <sup>-3</sup> ]                                                 | 1.700                                                                          |
| $\mu$ [mm <sup>-1</sup> ]                                                              | 3.076                                                                          |
| $\theta$ -range [°]                                                                    | 2.77 to 25.38                                                                  |
| Index range                                                                            | -34 ≤ <i>h</i> ≤ 35<br>-7 ≤ <i>k</i> ≤ 7<br>-18 ≤ <i>l</i> ≤ 18                |
| Reflections collected                                                                  | 15694                                                                          |
| Unique reflections                                                                     | 5034                                                                           |
| Observed reflections ( <i>I</i> > 2 $\sigma$ ( <i>I</i> ))                             | 3685                                                                           |
| parameters refined                                                                     | 361                                                                            |
| Final <i>R</i> <sub>1</sub> values ( <i>I</i> > 2 $\sigma$ ( <i>I</i> ))               | 0.0448                                                                         |
| Final <i>wR</i> ( <i>F</i> <sup>2</sup> ) values ( <i>I</i> > 2 $\sigma$ ( <i>I</i> )) | 0.1193                                                                         |
| Final <i>R</i> <sub>2</sub> values (all data)                                          | 0.0746                                                                         |
| Final <i>wR</i> ( <i>F</i> <sup>2</sup> ) values (all data)                            | 0.1379                                                                         |
| GOOF (goodness of fit)                                                                 | 0.907                                                                          |

$$R_1 = \frac{\sum(|F_o| - |F_c|)}{\sum|F_o|};$$

$$wR_2 = [\sum w(|F_o|^2 - |F_c|^2)^2 / \sum w|F_o|^2]^{1/2}$$

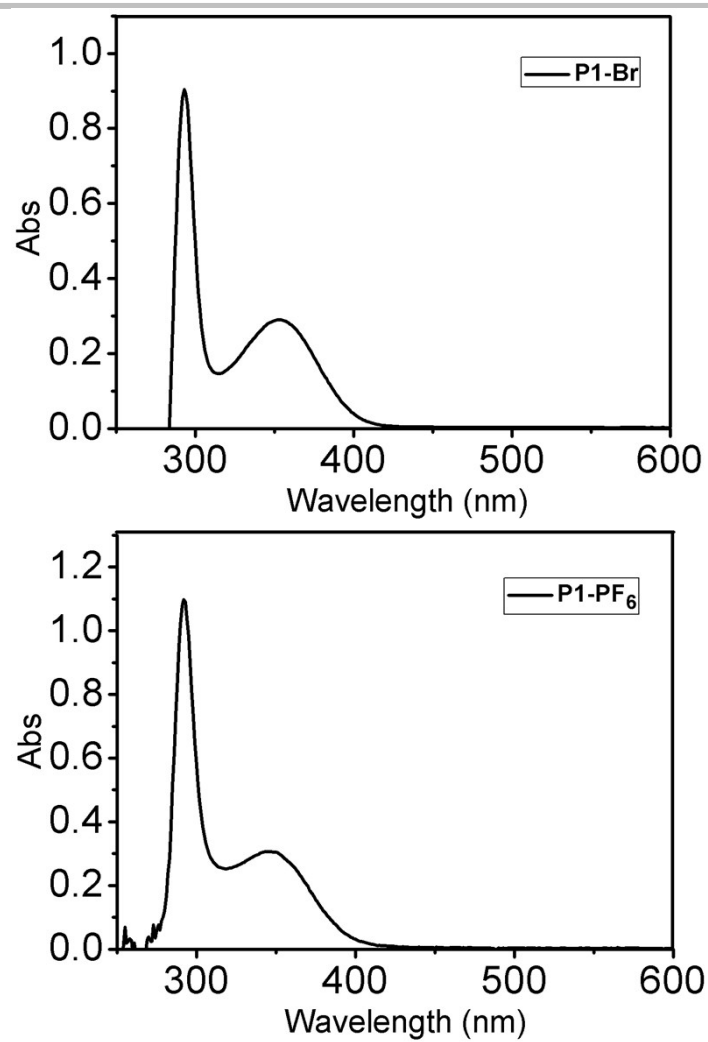

**Fig. S1** UV-vis absorption spectra of both **P1-Br** ( $\text{CH}_3\text{OH}$ ,  $1.5 \times 10^{-5}$  mol/L) and **P1-PF<sub>6</sub>** ( $\text{CH}_3\text{CN}$ ,  $2 \times 10^{-5}$  mol/L).

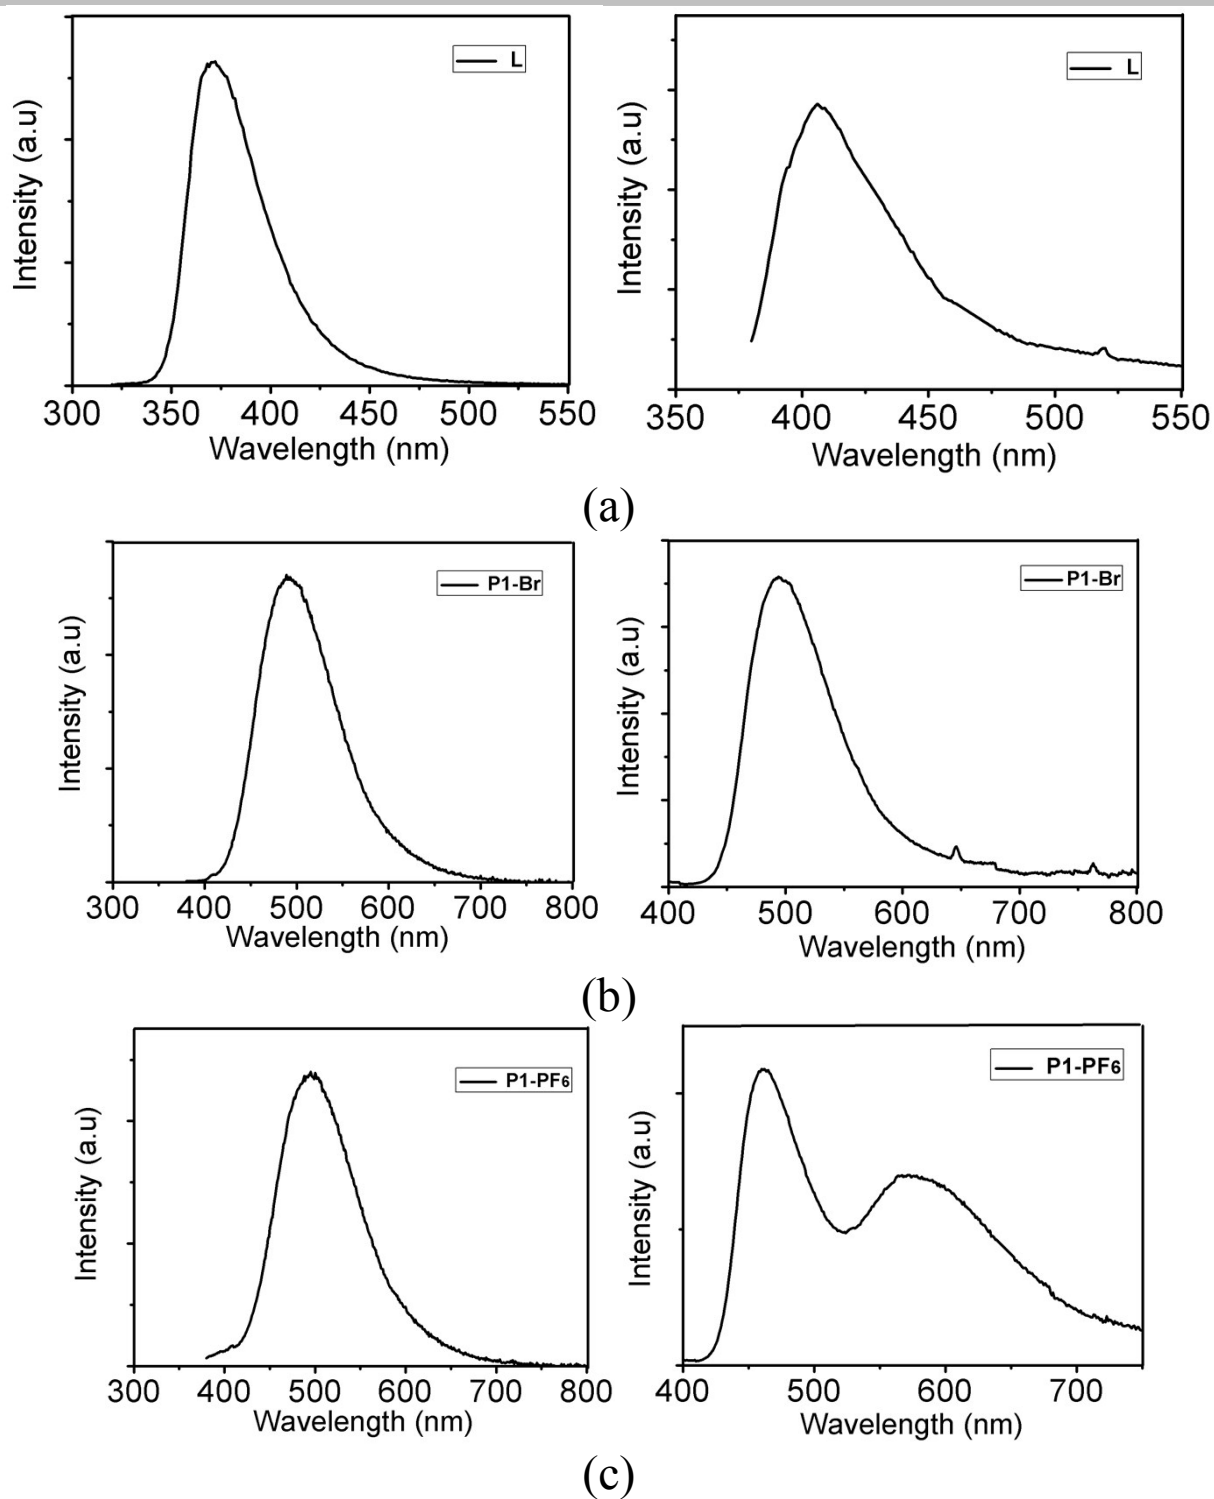

**Fig. S2** Photoluminescence spectra of the compounds in solution and in solid state. a) **L** in DCM ( $2 \times 10^{-5}$  mol/L, left) and in solid state (right); b) **P1-Br** in CH<sub>3</sub>OH ( $1.5 \times 10^{-5}$  mol/L, left) and in solid state (right); c) **P1-PF<sub>6</sub>** in CH<sub>3</sub>CN ( $2 \times 10^{-5}$  mol/L, left) and in solid state (right).

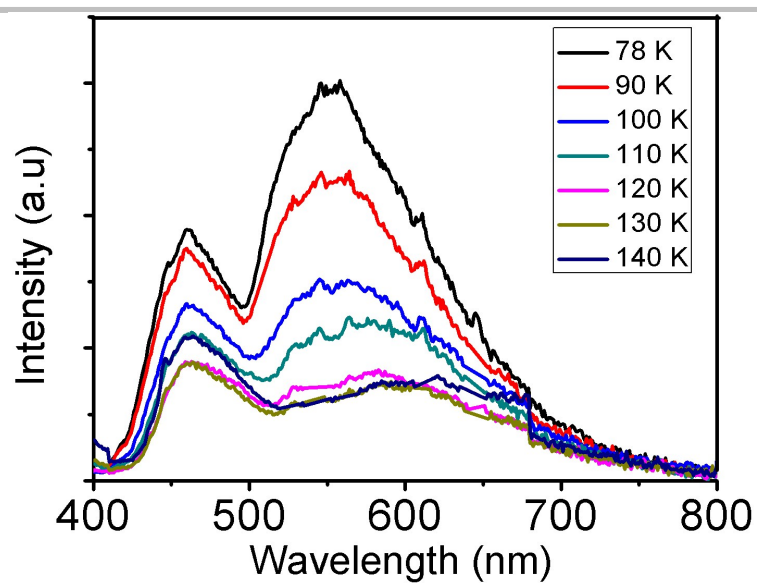

**Fig. S3** The temperature-dependent emission spectra of **P1-PF<sub>6</sub>** ( $\lambda_{\text{ex}} = 365$  nm) from 140 K to 78 K.

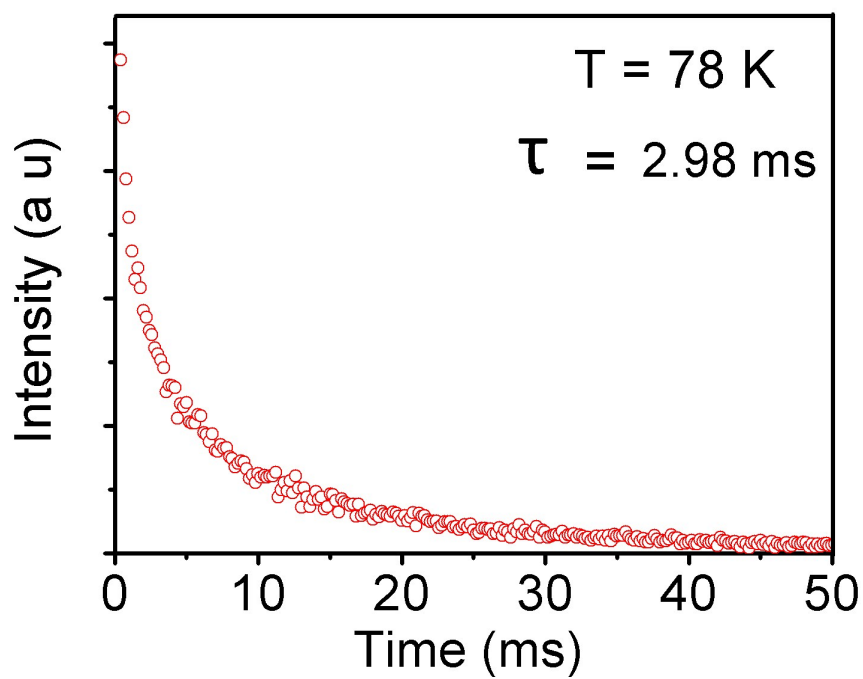

**Fig. S4** Transient photoluminescence decay spectra of **P1-PF<sub>6</sub>** for 582 nm at 78 K ( $\lambda_{\text{ex}} = 365$  nm)

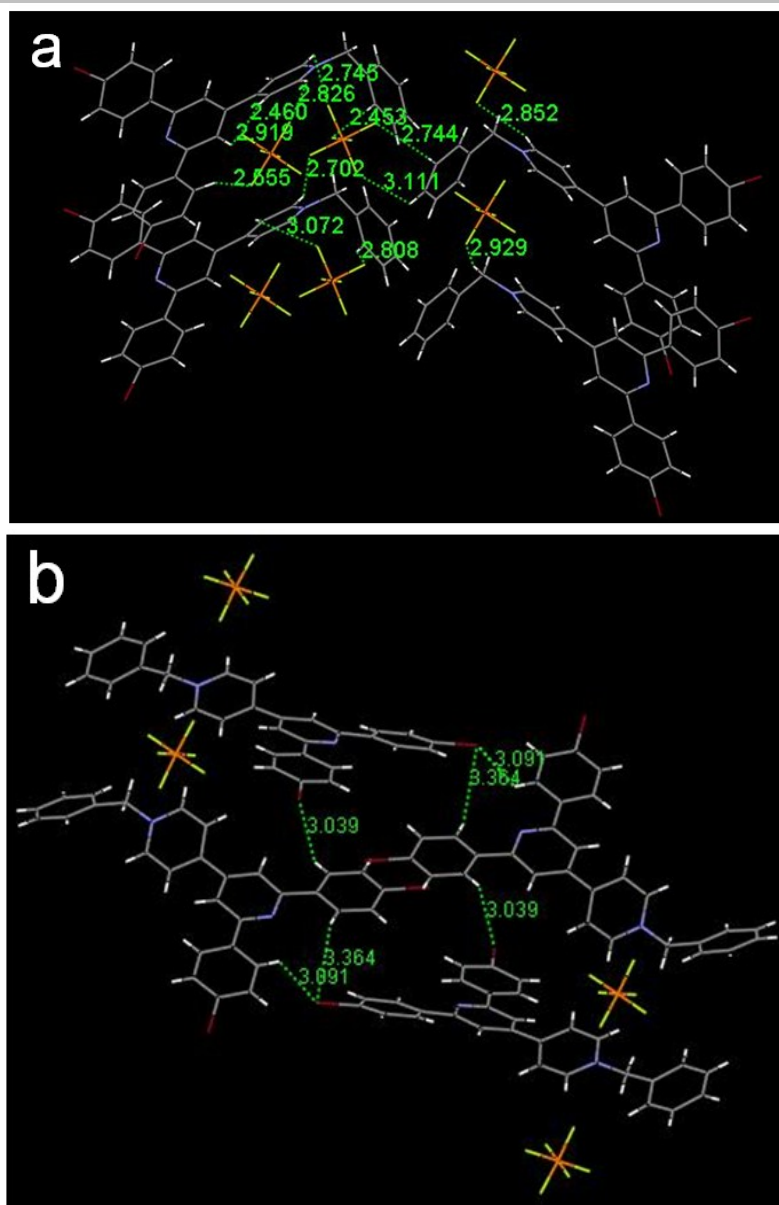

**Fig. S5** Numerous C-H...F hydrogen bond interactions (a) and C-H...Br-C bond interactions (b) in the crystal **P1-PF<sub>6</sub>**.

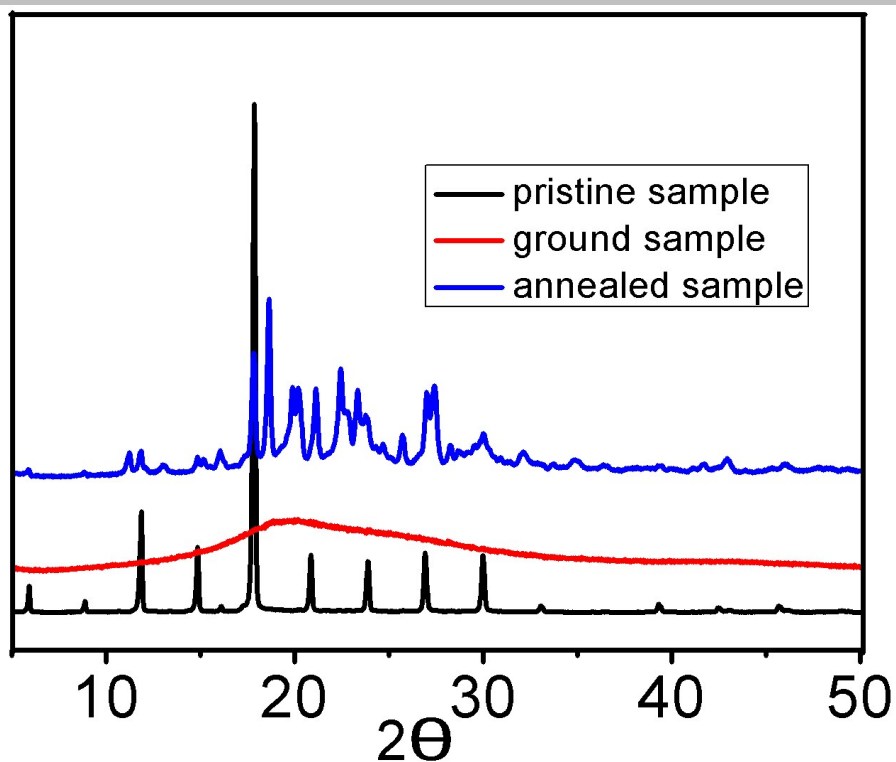

**Fig. S6** X-ray powder diffractions of  $\text{P1-PF}_6$  for pristine sample (black), ground sample (red), annealed sample (blue)

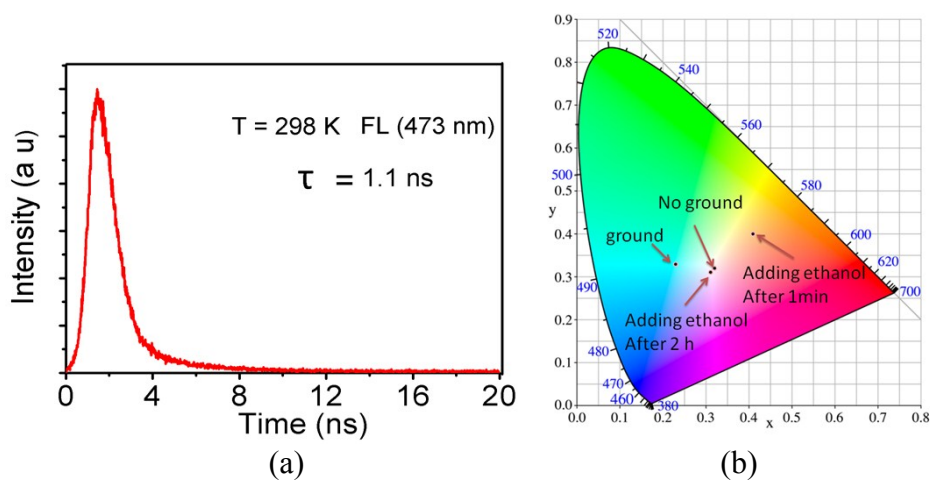

**Fig. S7** a) Transient photoluminescence decay spectra of  $\text{P1-PF}_6$  for 473 nm after heavy grinding at room temperature ( $\lambda_{\text{ex}} = 365 \text{ nm}$ ); b) The corresponding CIE chromaticity coordinates in CIE-1931 chromaticity diagram of  $\text{P1-PF}_6$  for the no **ground** samples, the **ground** samples, and the corresponding ground samples by adding ethanol after 1 min and after 2 h.



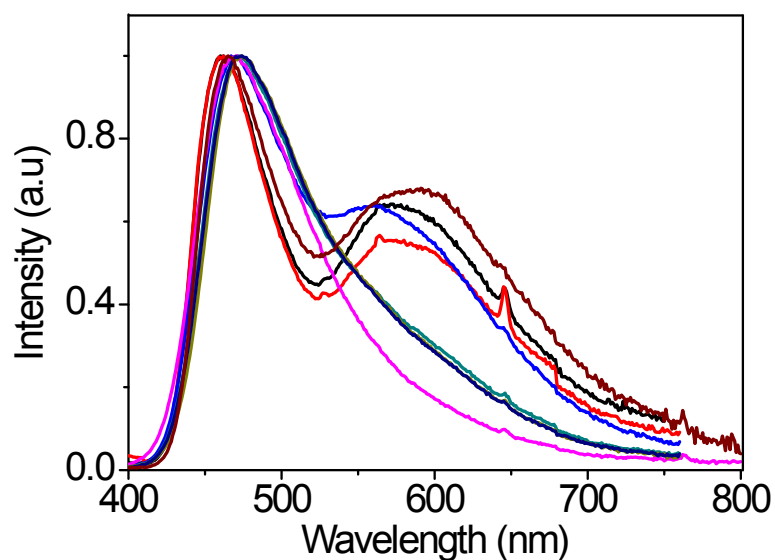

**Fig. S8** Emission switching graphs of the **P1-PF<sub>6</sub>** in multiple cycles upon the grinding/evaporation process.

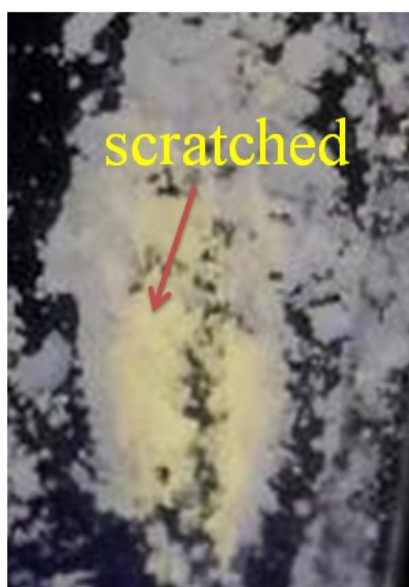

(a)

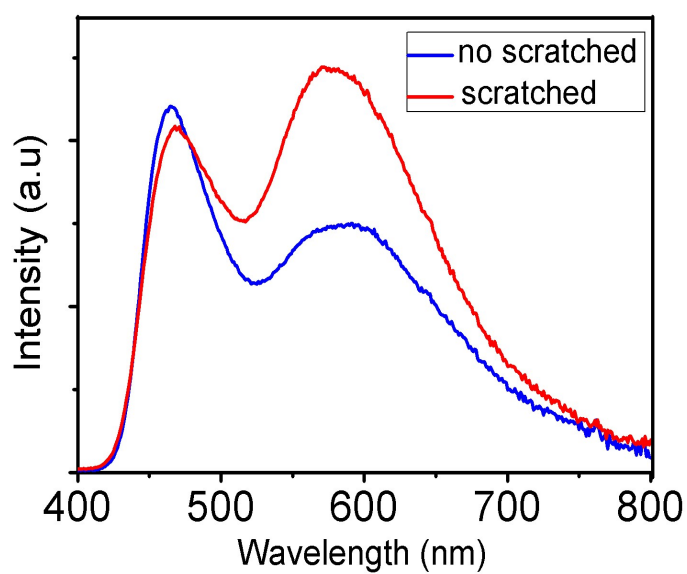

(b)

**Fig. S9** Emission photos of the **P1-PF<sub>6</sub>** samples scratched by a steel scoop under 365 nm UV irradiation; b) The emission spectra of the scratched **P1-PF<sub>6</sub>** ( $\lambda_{\text{ex}} = 365 \text{ nm}$ )

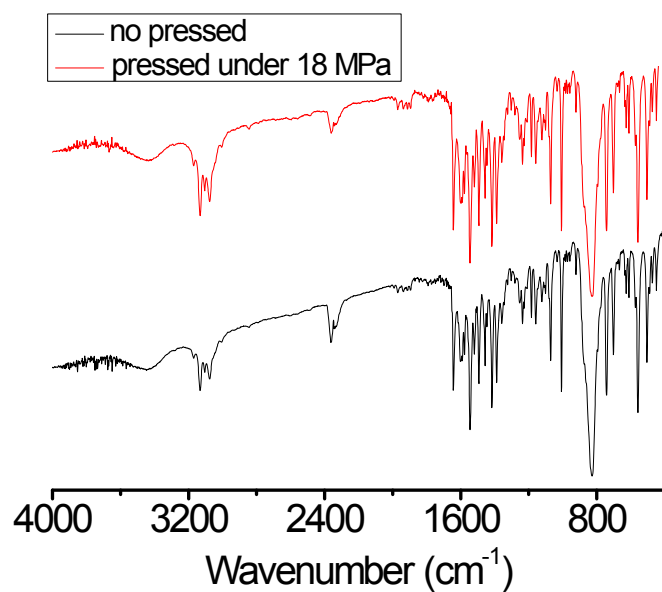

**Fig. S10** IR spectra of **P1-PF<sub>6</sub>** for the pressed samples and no pressed samples

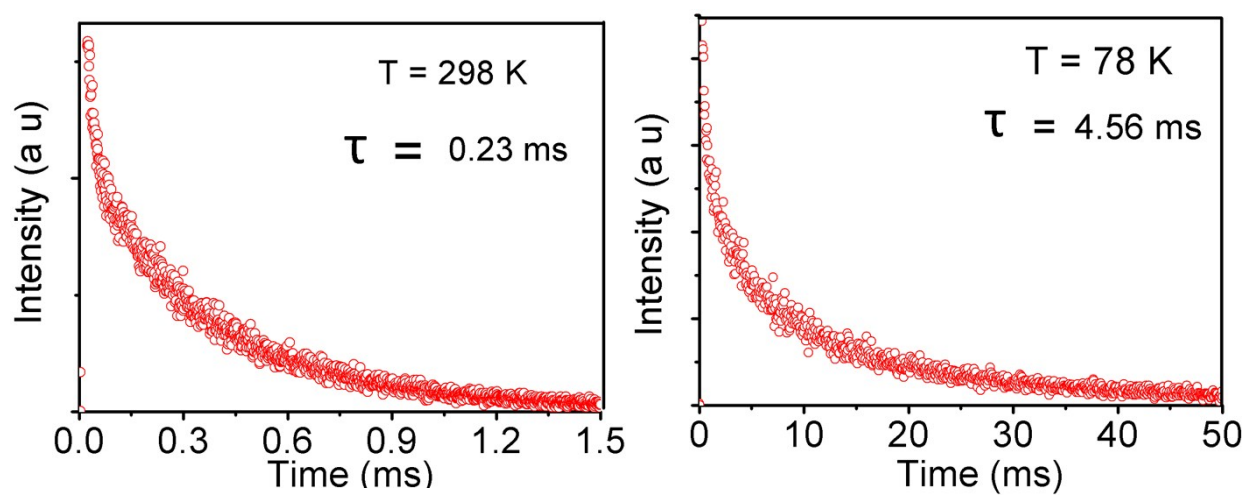

**Fig. S11** Transient photoluminescence decay spectra of **P1-PF<sub>6</sub>** for 582 nm ( $\lambda_{\text{ex}} = 365 \text{ nm}$ ) after mechanical pressing by using infrared tablet press method at room temperature and 78 K.

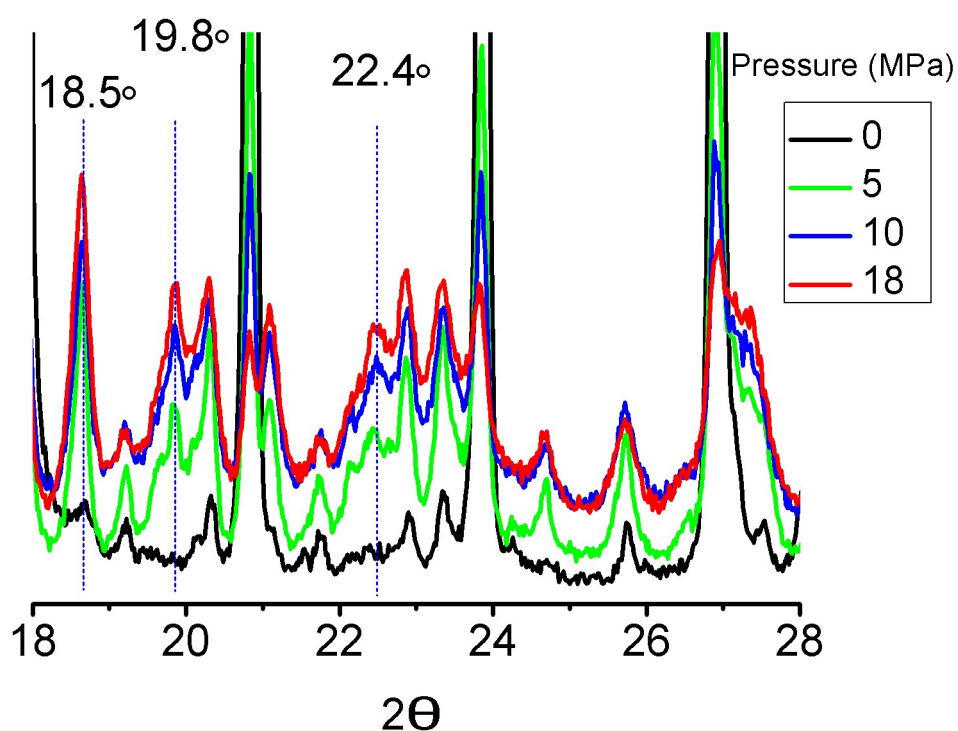

**Fig. S12** X-ray powder diffractions of **P1-PF<sub>6</sub>** under different pressures ( $2\theta = 18^\circ - 28^\circ$ ). After pressing, new peaks such as  $2\theta = 18.5^\circ$ ,  $19.8^\circ$  and  $22.4^\circ$  appear as compared to the original sample, and they rise in intensity gradually with increasing pressure.

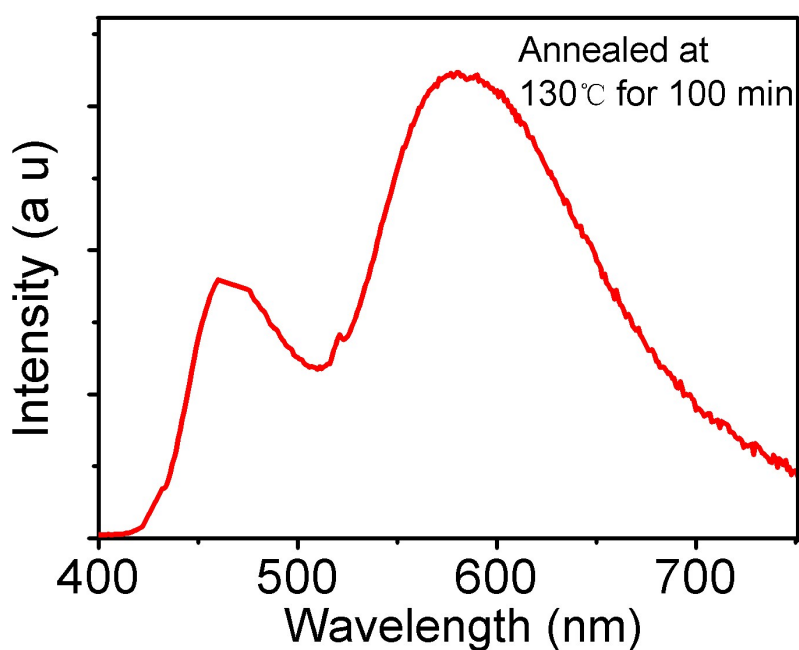

**Fig. S13** The emission spectra of **P1-PF<sub>6</sub>** ( $\lambda_{\text{ex}} = 365 \text{ nm}$ ) after heating at  $130^\circ\text{C}$  for 100 min. The phosphorescent emission intensity of the pressed crystalline state **P1-PF<sub>6</sub>** keeps almost unchanged

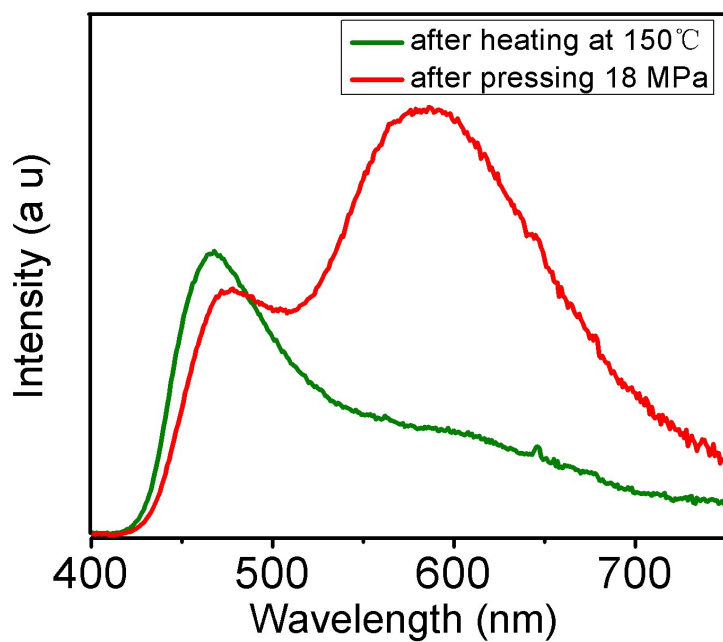

**Fig. S14** The emission spectra of **P1-PF<sub>6</sub>** ( $\lambda_{\text{ex}} = 365$  nm) after heating at 150 °C for 20 min (green), and then repressing under 18 MPa (red) by using infrared tablet press method

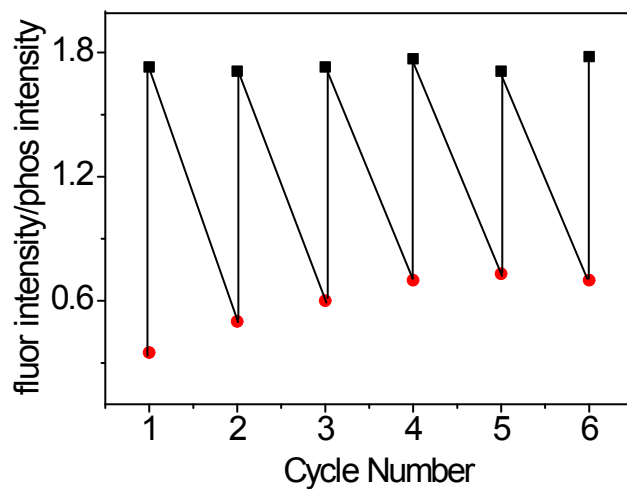

**Fig. S15** The emission switching graph of **P1-PF<sub>6</sub>** upon pressing-heating processes with fluor emission intensity/phos emission intensity vs cycle number

**Table S2** The absorption transitions for dimer of **P1-PF<sub>6</sub>** by TD-DFT method at the B3LYP/6-31G(d) level.

| Orbital transition | Energy | f        |
|--------------------|--------|----------|
| 346 → 349          | 1.05   | 0.000021 |
| 344 → 349          | 1.48   | 0.000202 |
| 342 → 349          | 1.58   | 0.000004 |
| 343 → 349          | 1.60   | 0.014454 |
| 341 → 349          | 1.62   | 0.000006 |
| 339 → 349          | 1.81   | 0.001782 |

---

## References

- [1] SMART & SAINT Software Reference Manuals, version 6.45; Bruker Analytical X-ray Systems, Inc.: Madison, WI, 2003.
- [2] Sheldrick, G. M. SADABS: Software for Empirical Absorption Correction, version 2.05; University of Göttingen: Göttingen, Germany, 2002.
- [3] Sheldrick, G. M. SHELXL97: Program for Crystal Structure Refinement; University of Göttingen: Göttingen, Germany, 1997.
- [4] Gaussian 09, Revision A.02, Frisch, M. J.; Trucks, G. W.; Schlegel, H. B.; Scuseria, G. E.; Robb, M. A.; Cheeseman, J. R.; Scalmani, G.; Barone, V.; Mennucci, B.; Petersson, G. A.; Nakatsuji, H.; Caricato, M.; Li, X.; Hratchian, H. P.; Izmaylov, A. F.; Bloino, J.; Zheng, G.; Sonnenberg, J. L.; Hada, M.; Ehara, M.; Toyota, K.; Fukuda, R.; Hasegawa, J.; Ishida, M.; Nakajima, T.; Honda, Y.; Kitao, O.; Nakai, H.; Vreven, T.; Montgomery, J. A., Jr.; Peralta, J. E.; Ogliaro, F.; Bearpark, M.; Heyd, J. J.; Brothers, E.; Kudin, K. N.; Staroverov, V. N.; Kobayashi, R.; Normand, J.; Raghavachari, K.; Rendell, A.; Burant, J. C.; Iyengar, S. S.; Tomasi, J.; Cossi, M.; Rega, N.; Millam, J. M.; Klene, M.; Knox, J. E.; Cross, J. B.; Bakken, V.; Adamo, C.; Jaramillo, J.; Gomperts, R.; Stratmann, R. E.; Yazyev, O.; Austin, A. J.; Cammi, R.; Pomelli, C.; Ochterski, J. W.; Martin, R. L.; Morokuma, K.; Zakrzewski, V. G.; Voth, G. A.; Salvador, P.; Dannenberg, J. J.; Dapprich, S.; Daniels, A. D.; Farkas, O.; Foresman, J. B.; Ortiz, J. V.; Cioslowski, J.; Fox, D. J. Gaussian, Inc., Wallingford CT, 2009.
